# Supplementary material for: Large-scale intrinsic connectivity is consistent across varying task demands
Source: PLoS One. 2019 Apr 10;14(4):e0213861. doi: 10.1371/journal.pone.0213861 (PMC6457563; doi:10.1371/journal.pone.0213861)
Supplement: S2 Data — All the values reported in the file are mean spatial correlation coefficients (and associated standard deviations) calculated from 100 bootstrapped ICA decomposition, separately for each network of interest and each steady-state condition. (XLSX) [file pone.0213861.s004.xlsx]

## Sheet: Sheet1
	REST		MOTOR		VISUAL		VISUOMOTOR		ATTENTION
ICN	MEAN	SD	MEAN	SD	MEAN	SD	MEAN	SD	MEAN	SD
MedVis	0.511	0.0337	0.5535	0.0633	0.5561	0.052	0.5057	0.0783	0.4138	0.0854
Occ	0.3289	0.0303	0.3115	0.0518	0.4408	0.0201	0.4359	0.0241	0.4618	0.027
LatVis	0.3907	0.0481	0.3821	0.0319	0.423	0.0481	0.4363	0.0671	0.3752	0.0552
DMN	0.3126	0.0402	0.3271	0.0485	0.4076	0.0636	0.3609	0.049	0.3352	0.0368
SM	0.3062	0.0142	0.286	0.0259	0.3036	0.0355	0.2519	0.0339	0.2684	0.0443
Temp	0.3059	0.0567	0.2411	0.0231	0.3169	0.0433	0.2576	0.0274	0.2862	0.0323
Exec	0.2994	0.0442	0.3556	0.0587	0.3737	0.0556	0.3912	0.0619	0.2361	0.041
Rlat	0.353	0.0435	0.3196	0.03	0.3278	0.0597	0.3439	0.0596	0.318	0.0507
Llat	0.3479	0.0477	0.3641	0.0581	0.3207	0.0492	0.3531	0.0571	0.3512	0.0468
